# Supplementary material
Source: PubMed Central journal article supplement (PMC5004783)

## ONLINE SUPPORTING INFORMATION

### **25-Year Weight Gain in a Racially Balanced Sample of U.S. Adults: The CARDIA Study**

Gareth R. Dutton, PhD<sup>1</sup>, Yongin Kim, MS<sup>1</sup>, David R. Jacobs Jr., PhD<sup>2</sup>, Xuelin Li, PhD<sup>1</sup>, Catherine M. Loria, PhD<sup>3</sup>, Jared P. Reis, PhD<sup>3</sup>, Mercedes Carnethon, PhD<sup>4</sup>, Nefertiti H. Durant, MD<sup>1</sup>, Penny Gordon-Larsen, PhD<sup>5</sup>, James M. Shikany, DrPH<sup>1</sup>, Stephen Sidney, MD<sup>6</sup>, Cora E. Lewis, MD<sup>1</sup>

<sup>1</sup> Division of Preventive Medicine, Department of Medicine, University of Alabama at Birmingham, Birmingham, AL

<sup>2</sup> Division of Epidemiology and Community Health, School of Public Health, University of Minnesota, Minneapolis, MN

<sup>3</sup> Division of Cardiovascular Sciences, National Heart, Lung, and Blood Institute, Bethesda, MD

<sup>4</sup> Department of Preventive Medicine, Feinberg School of Medicine, Northwestern University, Chicago, IL

<sup>5</sup> Department of Nutrition, Gillings School of Global Public Health, University of North Carolina at Chapel Hill, Chapel Hill, NC

<sup>6</sup> Division of Research, Kaiser Permanente Northern California, Oakland, CA

**Corresponding author:** Gareth R. Dutton, University of Alabama at Birmingham, Division of Preventive Medicine, 1717 11<sup>th</sup> Avenue South, Medical Towers 615, Birmingham, AL 35205  
Phone: (205) 934-6876; Email: [gdutton@uabmc.edu](mailto:gdutton@uabmc.edu)

**Table S1:** Comparison of baseline characteristics for participants attending vs not attending the Year 25 follow-up, by race and sex

|                        | Attenders   | Nonattenders | P value |
|------------------------|-------------|--------------|---------|
| Black men              | (n=632)     | (n=486)      |         |
| Age, years             | 24.4 ± 3.8  | 23.9 ± 3.8   | 0.052   |
| Education, years       | 13.1 ± 1.9  | 12.7 ± 1.8   | <.001   |
| Current smoker, %      | 32.4        | 41.6         | 0.002   |
| Weight, kg             | 78.1 ± 15.0 | 77.1 ± 14.5  | 0.244   |
| BMI, kg/m <sup>2</sup> | 24.8 ± 4.3  | 24.6 ± 4.0   | 0.375   |
| Black women            | (n=876)     | (n=455)      |         |
| Age, years             | 24.6 ± 3.8  | 24.2 ± 3.9   | 0.073   |
| Education, years       | 13.2 ± 1.8  | 13.0 ± 1.7   | 0.004   |
| Current smoker, %      | 27.6        | 36.3         | 0.011   |
| Weight, kg             | 70.3 ± 17.1 | 69.9 ± 19.0  | 0.712   |
| BMI, kg/m <sup>2</sup> | 26.2 ± 5.8  | 26.2 ± 6.6   | 0.911   |
| White men              | (n=845)     | (n=296)      |         |
| Age, years             | 25.6 ± 3.3  | 24.9 ± 3.5   | 0.002   |
| Education, years       | 14.9 ± 2.4  | 13.9 ± 2.6   | <.001   |
| Current smoker, %      | 22.5        | 36.5         | <.001   |
| Weight, kg             | 77.3 ± 12.0 | 77.4 ± 13.6  | 0.960   |
| BMI, kg/m <sup>2</sup> | 24.3 ± 3.3  | 24.4 ± 3.8   | 0.685   |
| White women            | (n=907)     | (n=276)      |         |
| Age, years             | 25.7 ± 3.3  | 24.9 ± 3.4   | <.001   |
| Education, years       | 14.8 ± 2.2  | 13.8 ± 2.3   | <.001   |
| Current smoker, %      | 23.3        | 37.7         | <.001   |
| Weight, kg             | 63.0 ± 10.9 | 65.6 ± 15.1  | 0.007   |
| BMI, kg/m <sup>2</sup> | 23.1 ± 3.8  | 24.0 ± 5.1   | 0.008   |

**Table S2:** Changes in BMI status from baseline to Year 25, by race and sex, N (%)

| Baseline BMI status                                                                                                                      | Year 25 BMI status |             |             |
|------------------------------------------------------------------------------------------------------------------------------------------|--------------------|-------------|-------------|
|                                                                                                                                          | NW                 | OW          | OB          |
| Black Men                                                                                                                                |                    |             |             |
| NW                                                                                                                                       | 101 (25.7%)        | 183 (46.6%) | 109 (27.7%) |
| OW                                                                                                                                       | 4 (2.4%)           | 49 (29.0%)  | 116 (68.6%) |
| OB                                                                                                                                       | 2 (2.9%)           | 1 (1.4%)    | 67 (95.7%)  |
| Black Women                                                                                                                              |                    |             |             |
| NW                                                                                                                                       | 94 (20.4%)         | 159 (34.6%) | 207 (45.0%) |
| OW                                                                                                                                       | 9 (4.0%)           | 31 (13.7%)  | 187 (82.4%) |
| OB                                                                                                                                       | 0 (0.0%)           | 5 (2.6%)    | 184 (97.4%) |
| White Men                                                                                                                                |                    |             |             |
| NW                                                                                                                                       | 185 (33.7%)        | 278 (50.6%) | 86 (15.7%)  |
| OW                                                                                                                                       | 7 (2.7%)           | 84 (32.9%)  | 164 (64.3%) |
| OB                                                                                                                                       | 0 (0.0%)           | 2 (5.0%)    | 38 (95.0%)  |
| White Women                                                                                                                              |                    |             |             |
| NW                                                                                                                                       | 357 (50.0%)        | 213 (29.8%) | 144 (20.2%) |
| OW                                                                                                                                       | 10 (7.0%)          | 30 (21.0%)  | 103 (72.0%) |
| OB                                                                                                                                       | 0 (0.0%)           | 3 (6.0%)    | 47 (94.0%)  |
| NW=normal weight (BMI<25 kg/m <sup>2</sup> ); OW=overweight (BMI=25-29.9 kg/m <sup>2</sup> );<br>OB=obesity (BMI>=30 kg/m <sup>2</sup> ) |                    |             |             |

**Figure S1.** Observed and fitted model-based time trends in weight (kg) according to smoking status, by race and sex.

Figure S1.

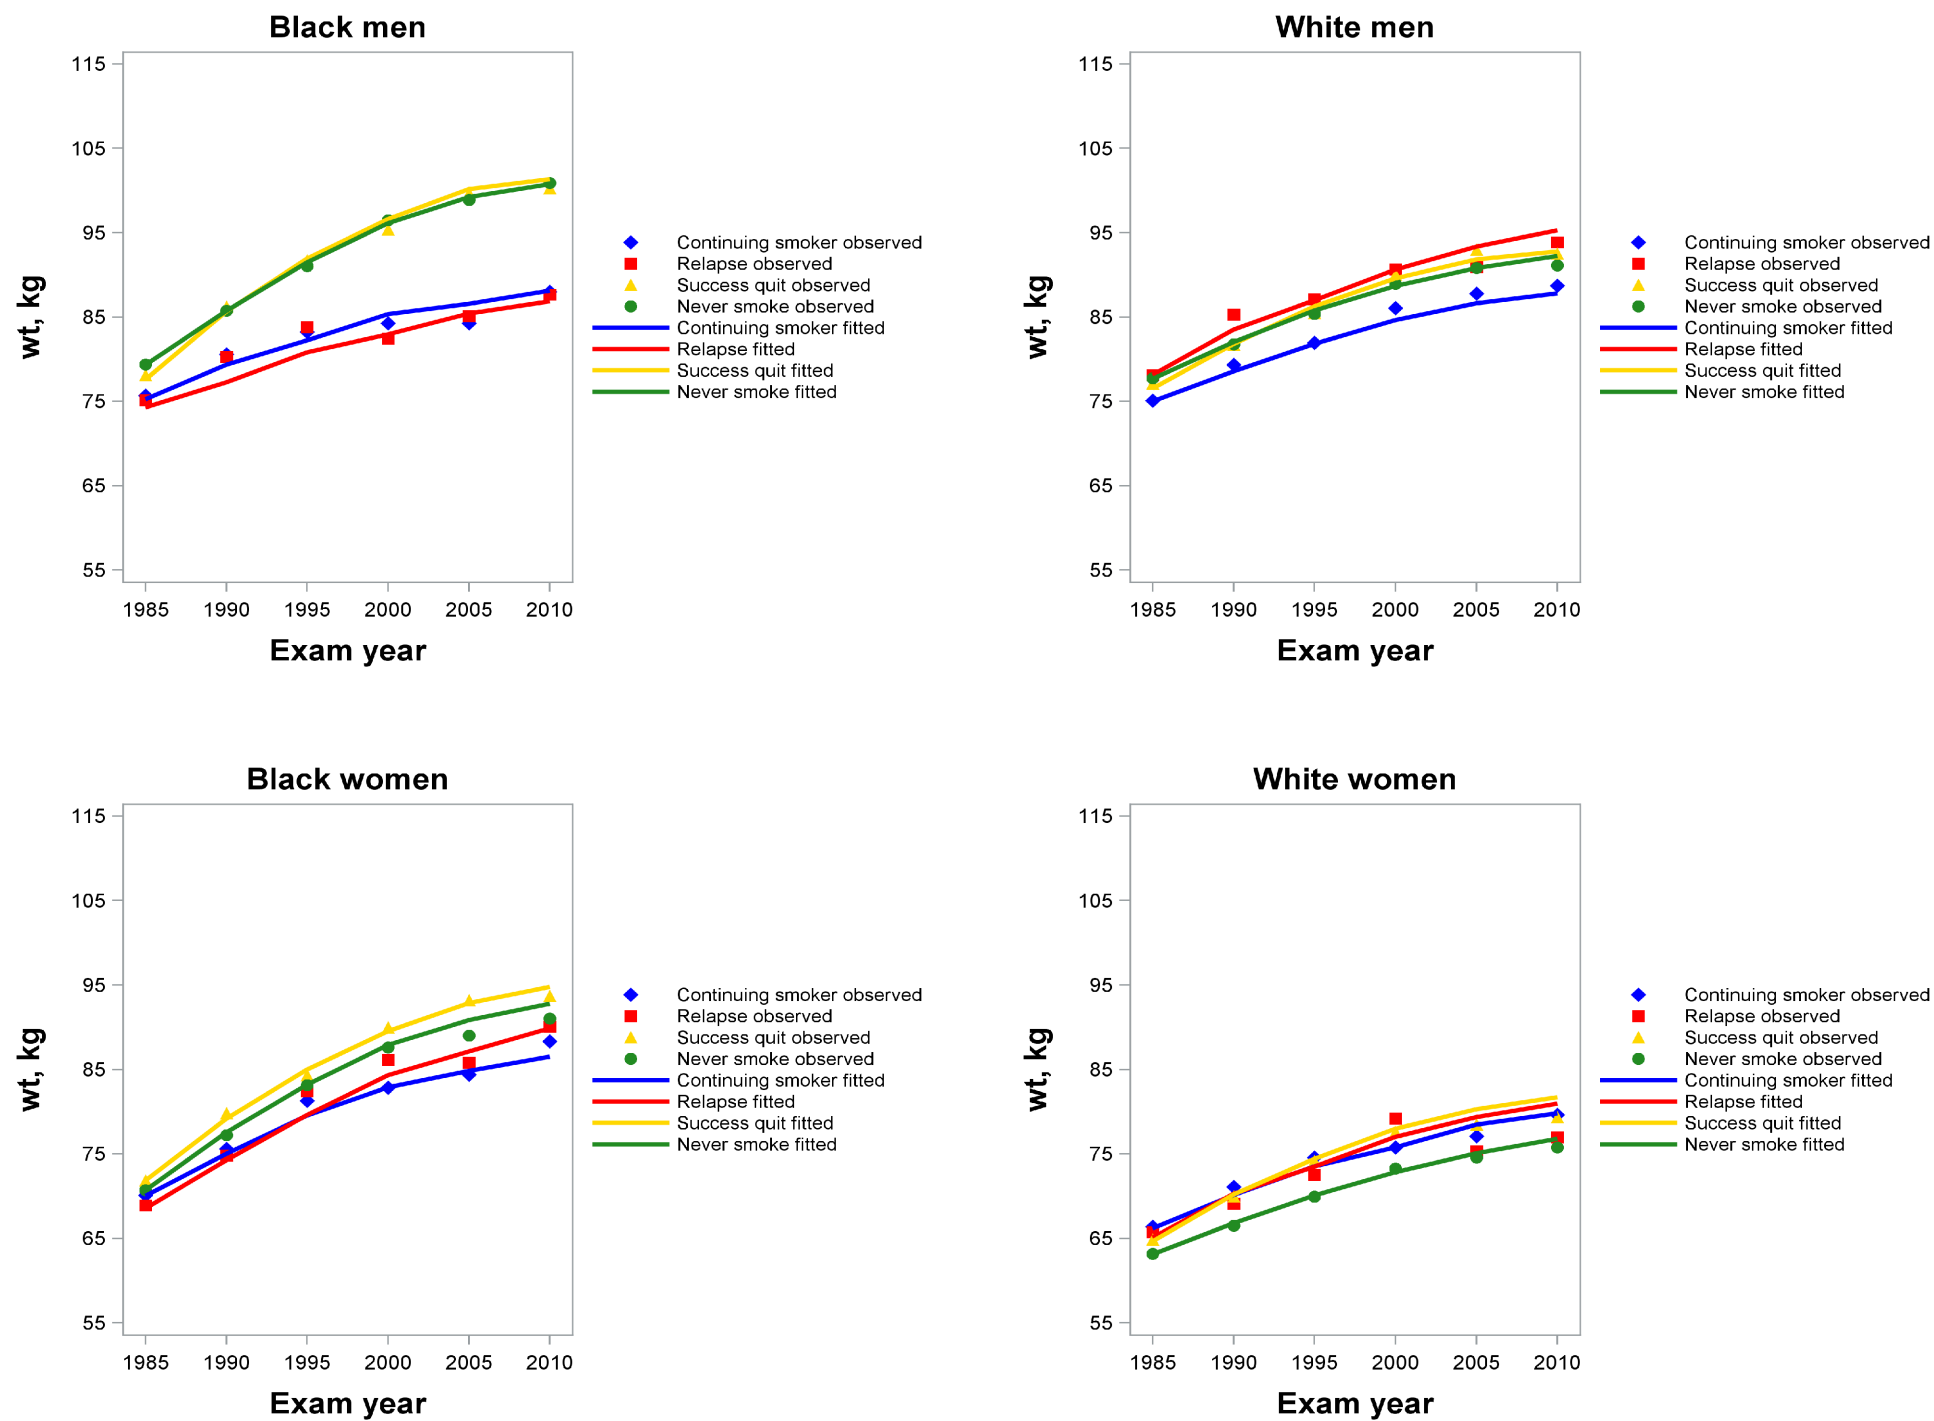

Supplement: NIHMS788837-supplement-Supp_Info.pdf [file NIHMS788837-supplement-Supp_Info.pdf]
